# Supplementary material for: Syntheses and Biological Studies of Cu(II) Complexes Bearing Bis(pyrazol-1-yl)- and Bis(triazol-1-yl)-acetato Heteroscorpionate Ligands
Source: PubMed Central journal article supplement (PMC6539868; doi:10.3390/molecules24091761), 2019-05-07
Supplement: molecules-24-01761-s001.pdf [file molecules-24-01761-s001.pdf]

# Supplementary Information (ESI)

## Syntheses and biological studies of Cu(II) complexes bearing bis(pyrazol-1-yl)- and bis(triazol-1-yl)-acetato heteroscorpionate ligands

Maura Pellei,<sup>a\*</sup> Valentina Gandin,<sup>b\*</sup> Luciano Marchiò,<sup>c</sup> Cristina Marzano,<sup>b</sup> Luca Bagnarelli<sup>a</sup> and Carlo Santini<sup>a</sup>

<sup>a</sup>*School of Science and Technology, Chemistry Division, University of Camerino, via S. Agostino 1, 62032 Camerino, Macerata, Italy*

<sup>b</sup>*Department of Pharmaceutical and Pharmacological Sciences, University of Padova, via Marzolo 5, 35131 Padova, Italy*

<sup>c</sup>*Department of Chemistry, Life Science, and Environmental Sustainability, University of Parma, Parco Area delle Scienze 17A, Parma, 43124, Italy*

### \*Corresponding authors:

(Maura Pellei) E-mail: [maura.pellei@unicam.it](mailto:maura.pellei@unicam.it)

(Valentina Gandin) E-mail: [valentina.gandin@unipd.it](mailto:valentina.gandin@unipd.it)

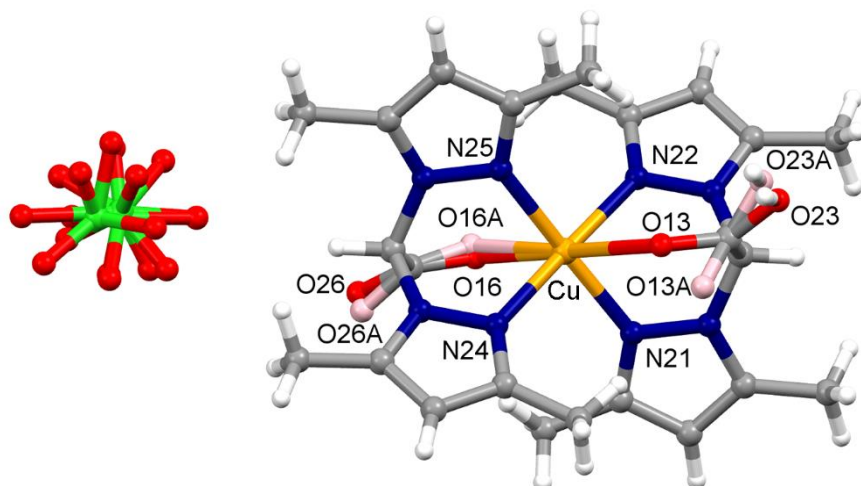

**Figure S1.** Asymmetric unit of (1) highlighting the disordered  $\text{ClO}_4^-$  anion and the disordered carboxylic and carboxylate moieties.

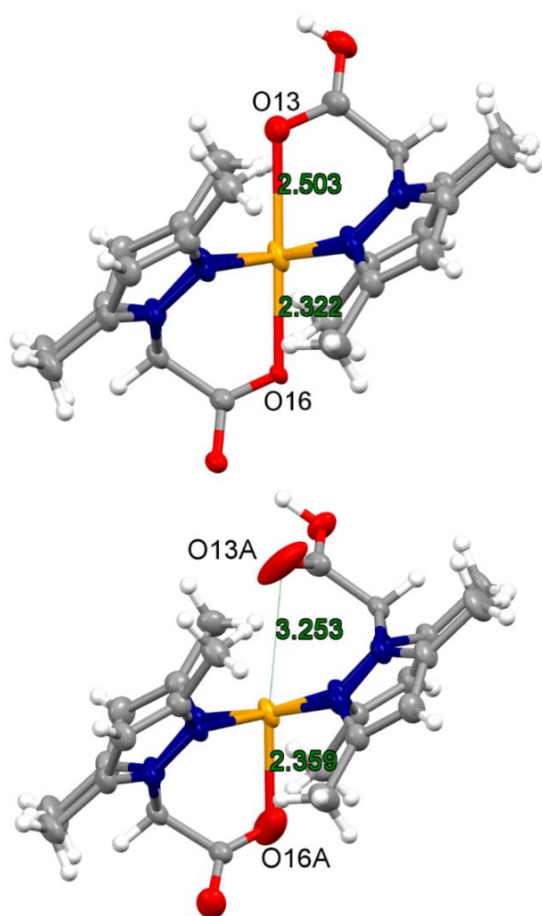

**Figure S2.** Distorted octahedral (above) and square pyramidal (below) geometries found in the structure, according to the disordered carboxylic/carboxylate groups.

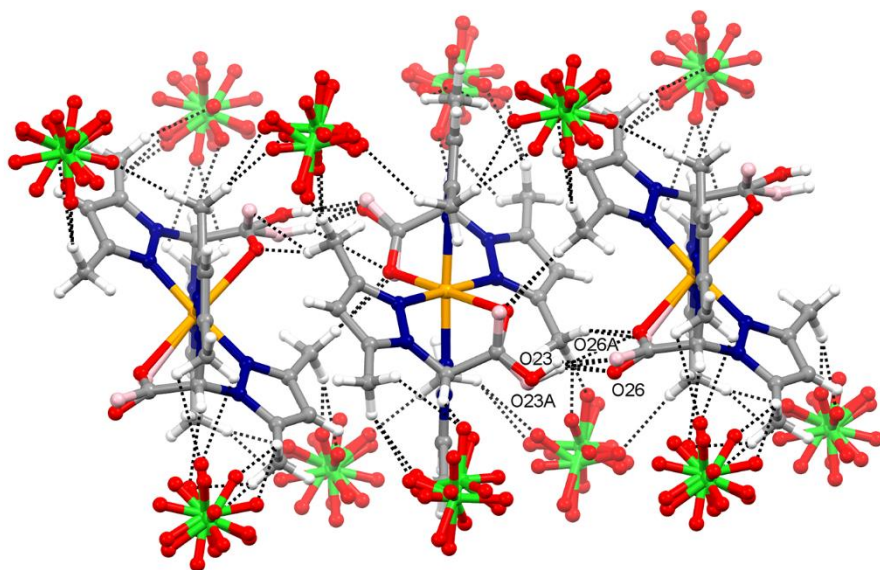

**Figure S3.** Portion of the crystal packing of (1) showing the weak interactions exchanged by the complex cation and the surrounding environment.

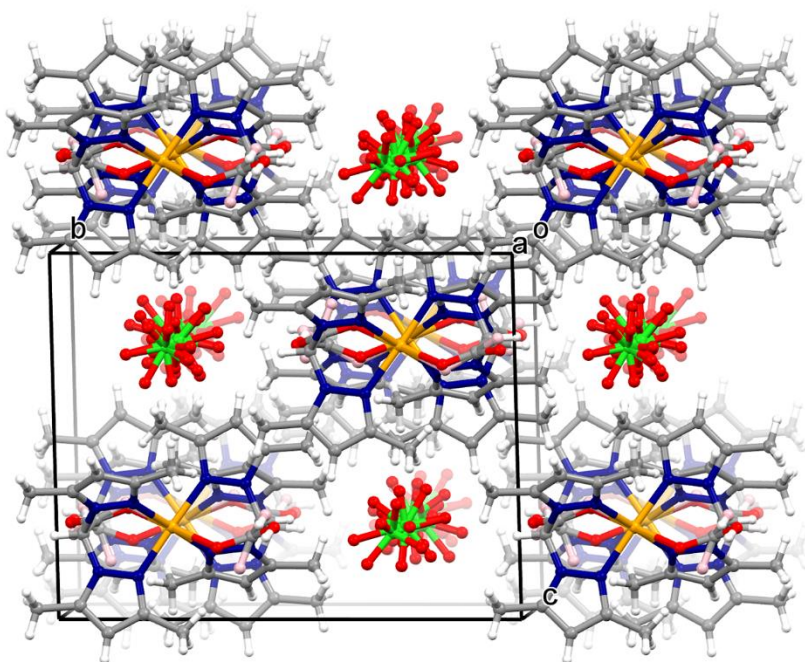

**Figure S4.** Crystal packing of (1) as viewed along the a crystallographic axis.
